# Supplementary material
Source: PubMed Central journal article supplement (PMC3457639)
Supplement: NIHMS399396-supplement-Suppl_Data_Table_1.pdf [file NIHMS399396-supplement-Suppl_Data_Table_1.pdf]

**Table S1** Types of *EGFR*, *KRAS* and *p53* gene alterations in lung cancer cell lines

| Cell line | Histological type | Mutation            |             |                   |             |
|-----------|-------------------|---------------------|-------------|-------------------|-------------|
|           |                   | <i>EGFR</i>         | <i>KRAS</i> | <i>p53</i>        | <i>LKB1</i> |
| 11-18     | AdC               | L858R               |             | K164Ter           | HD          |
| A427      | AdC               |                     | G12D        |                   | HD          |
| A549      | AdC               |                     | G12S        |                   | Mut         |
| ABC-1     | AdC               |                     |             | P278S             |             |
| H23       | AdC               |                     | G12C        | M246I             | Mut         |
| H322      | AdC               |                     |             | R248L             |             |
| H441      | AdC               |                     | G12V        | R158L             |             |
| H1395     | AdC               |                     |             |                   | HD          |
| H1437     | AdC               |                     |             | R267P             |             |
| H1648     | AdC               |                     |             | 35 42stop         |             |
| H1703     | AdC               |                     |             | (IVS8 +1g>t)      |             |
| H2009     | AdC               |                     | G12S        | R273L             |             |
| H2087     | AdC               |                     |             | V157F             |             |
| H2122     | AdC               |                     | G12C        | C176F             | HD          |
| H2126     | AdC               |                     |             | E62Ter            | HD          |
| H2347     | AdC               |                     |             |                   |             |
| HCC44     | AdC               |                     | G12C        | S94Ter+R175L      | Mut         |
| HCC78     | AdC               |                     |             | S241F             |             |
| HCC515    | AdC               |                     | G12D        | L194F             | Mut         |
| Ma-1      | AdC               | E746-A750 del       |             | R248Q             |             |
| Ma-17     | AdC               |                     |             | Y126C             |             |
| Ma-24     | AdC               | D709G               |             | R337C             | HD          |
| Ma-26     | AdC               |                     |             |                   |             |
| Ma-29     | AdC               |                     |             | S121Ter           | HD+Mut      |
| PC-3      | AdC               | L747-E749del, A750P |             | R282W             |             |
| PC-7      | AdC               |                     |             | H214R             | Mut         |
| PC-9      | AdC               | E746-A750 del       |             | R248Q             |             |
| PC-14     | AdC               |                     |             | R248W             |             |
| RERF-LCMS | AdC               |                     |             | R248L             |             |
| RERF-LCOK | AdC               |                     |             | F113C             |             |
| VMRC-LCD  | AdC               |                     |             | R175H             | Mut         |
| H596      | AdSqC             |                     |             | G245C             |             |
| HCC366    | AdSqC             |                     |             | Y220C             | HD          |
| EBC-1     | SqC               |                     |             | E171Ter           |             |
| H157      | SqC               |                     | G12R        | 35 42stop+E298Ter | HD          |
| H520      | SqC               |                     |             | W146Ter           |             |
| HCC15     | SqC               |                     |             | D259V             | HD          |
| HCC95     | SqC               |                     |             |                   |             |
| LC1-Sq    | SqC               |                     |             | M237I             |             |
| LK2       | SqC               |                     |             | V272M             |             |
| PC-10     | SqC               |                     |             | G245C             |             |
| SK_MES_1  | SqC               |                     |             | E298Ter           |             |
| Sq1       | SqC               |                     |             | (IVS4 +2t>c)      |             |
| SQ5       | SqC               |                     |             |                   | HD          |
| H1155     | LCC               |                     | Q61H        | R213R+R273H       |             |
| H1299     | LCC               |                     |             | HD                |             |
| Lu65      | LCC               |                     | G12C        | E11Q              | HD          |
| Lu99      | LCC               |                     | G12C        |                   |             |
| Ma-2      | LCC               |                     |             | R175H             |             |
| Ma-25     | LCC               |                     |             | M237I             | Mut         |
| PC-13     | LCC               |                     |             | G334V             | Mut         |
| H69       | SCLC              |                     |             | E171Ter           |             |
| H82       | SCLC              |                     |             |                   |             |

|       |      |         |    |
|-------|------|---------|----|
| H128  | SCLC |         |    |
| H209  | SCLC |         |    |
| H526  | SCLC |         |    |
| H841  | SCLC | C242S   |    |
| H1184 | SCLC | D259V   | HD |
| H1819 | SCLC |         |    |
| H1963 | SCLC | V147D   |    |
| H2107 | SCLC | K101Ter |    |
| H2141 | SCLC | R209Ter |    |
| H2171 | SCLC | Q144Ter |    |
| H2195 | SCLC | V157F   |    |
| HCC33 | SCLC | C242Y   |    |
| Lu134 | SCLC | P278L   |    |
| Lu135 | SCLC | G244C   |    |
| Lu139 | SCLC | V157F   |    |
| Ms18  | SCLC |         |    |
| N417  | SCLC | E298Ter |    |

---

HD, homozygous deletion; Mut, point mutation
